# Supplementary material for: Identification of Phytogenic Compounds with Antioxidant Action That Protect Porcine Intestinal Epithelial Cells from Hydrogen Peroxide Induced Oxidative Damage
Source: MDPI journal article supplement (doi:10.3390/antiox11112134), 2022-10-28
Supplement: s1 [file s1]

**Table S1.** Primers used in this study.

| Gene         | Sequence                        | Product size (bp) | Accession number |
|--------------|---------------------------------|-------------------|------------------|
| <i>GAPDH</i> | F: 5'-GCTACACTGAGGACCAGGTTG-3'  | 146               | XM_021091114.1   |
|              | R: 5'-CCTGTTGCTGTAGCCAAATTC-3'  |                   |                  |
| <i>HO-1</i>  | F: 5'-TACCGCTCCCGAATGAACAC-3'   | 209               | NM_001004027.1   |
|              | R: 5'-GTCACGGGAGTGGAGTCTTG-3'   |                   |                  |
| <i>NQO1</i>  | F: 5'-GATCATACTGGCCCACTCCG-3'   | 200               | NM_001159613.1   |
|              | R: 5'-GAGCAGTCTCGGCAGGATAC-3'   |                   |                  |
| <i>SOD1</i>  | F: 5'-GAGACCTGGGCAATGTGACT-3'   | 139               | NM_001190422.1   |
|              | R: 5'-CTGCCCAAGTCATCTGGTTT-3'   |                   |                  |
| <i>CAT</i>   | F: 5'- GGACATGGTCTGGGACTTCT-3'  | 221               | NM_214301.2      |
|              | R: 5'- GTCTTGCTGCATCTTCAACG-3'  |                   |                  |
| <i>GPX1</i>  | F: 5'- CCTAGCAGTGCCTAGAGTGC -3' | 143               | NM_214201.1      |
|              | R: 5'- CGCCCATCTCAGGGGATTTT -3' |                   |                  |

**Table S2.** Antibiotics used in this study.

| Antibody           | Supplier                   | Dilution |
|--------------------|----------------------------|----------|
| GAPDH (#REK0005)   | Real-Ab (Tianjing, China)  | 1:5000   |
| Bcl-2 (#4223)      | CST (Danvers, MA, USA)     | 1:500    |
| Bax (cat no:#2772) | CST                        | 1:500    |
| Caspase3 (#9665)   | CST                        | 1:500    |
| C-Capase3 (#9664)  | CST                        | 1:500    |
| Nrf2 (#A1224)      | Abclonal                   | 1:500    |
| p-Nrf2 (#ab76026)  | Abcam (Cambridge, MA, USA) | 1:500    |
| Keap1 (#ab118285)  | Abcam                      | 1:500    |
